# Supplementary material
Source: PubMed Central journal article supplement (PMC3654057)
Supplement: NIHMS462528-supplement-1_si_001.pdf [file NIHMS462528-supplement-1_si_001.pdf]

# Self-Assembling Multidomain Peptide Fibers with Aromatic Cores

Erica L. Bakota<sup>†</sup>, Ozge Sensoy<sup>‡</sup>, Beytullah Ozgur<sup>‡</sup>, Mehmet Sayar<sup>‡</sup> and Jeffrey D. Hartgerink<sup>§†</sup>

<sup>†</sup> Department of Chemistry and <sup>§</sup> Department of Bioengineering Rice University, 6100 South Main St., Houston, TX 77005

<sup>‡</sup> Department of Mechanical Engineering and Chemical and Biological Engineering Koc University, Istanbul, Turkey

## SUPPORTING INFORMATION

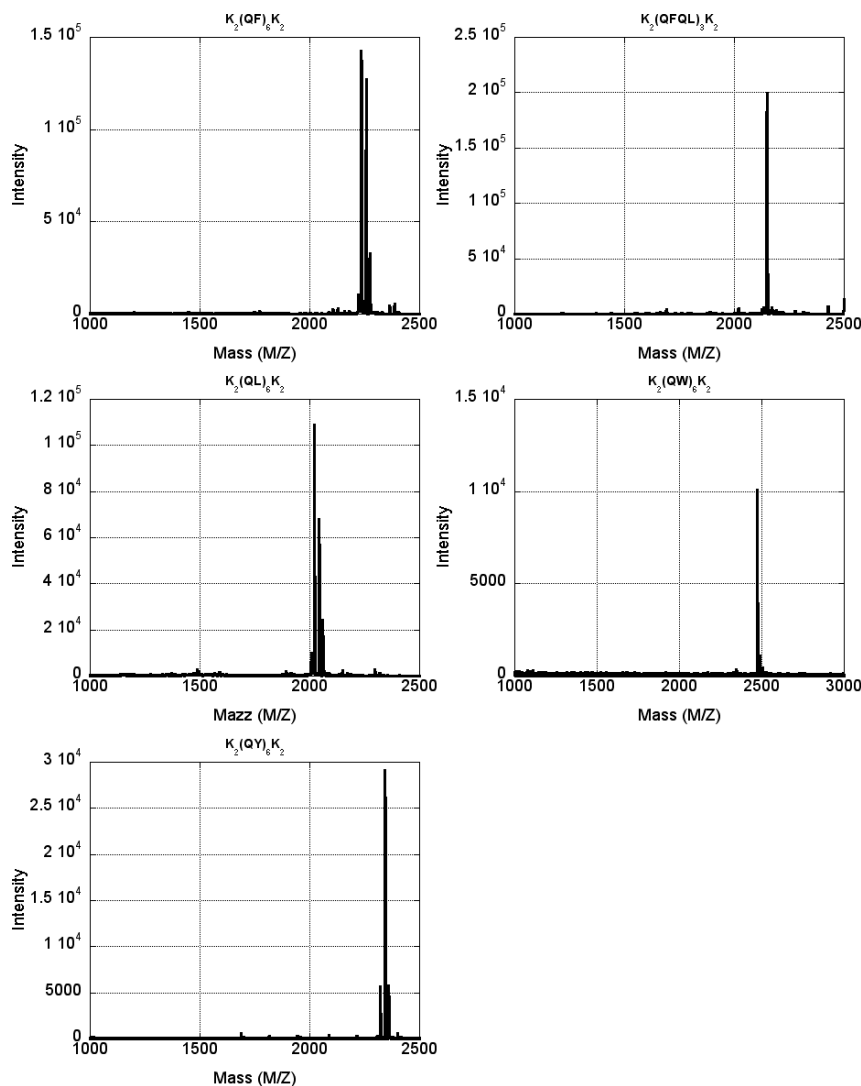

**Figure S1.** MALDI-TOF mass spectrometry of multidomain peptides.  $K_2(QF)_6K_2$ : Expected Mass: 2222.2, Observed Mass: 2221.2 (M+H)<sup>+</sup>.  $K_2(QFQL)_3K_2$ : Expected Mass: 2121.5, Observed Mass: 2126.0 (M+H)<sup>+</sup>.  $K_2(QL)_6K_2$ : Expected Mass: 2019.5, Observed Mass: 2019.8 (M+H)<sup>+</sup>.  $K_2(QW)_6K_2$ : Expected Mass: 2457.8, Observed Mass: 2458.7 (M+H)<sup>+</sup>.  $K_2(QY)_6K_2$ : Expected Mass: 2319.6, Observed Mass: 2319.9 (M+H)<sup>+</sup> and 2342.0 (M+Na)<sup>+</sup>.

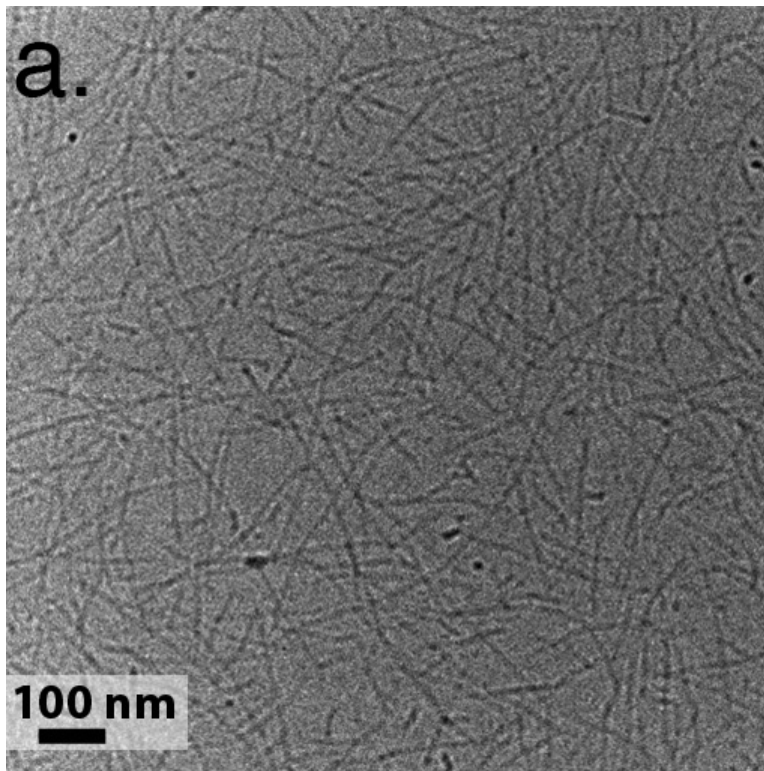

Figure 6a presented at a larger size.

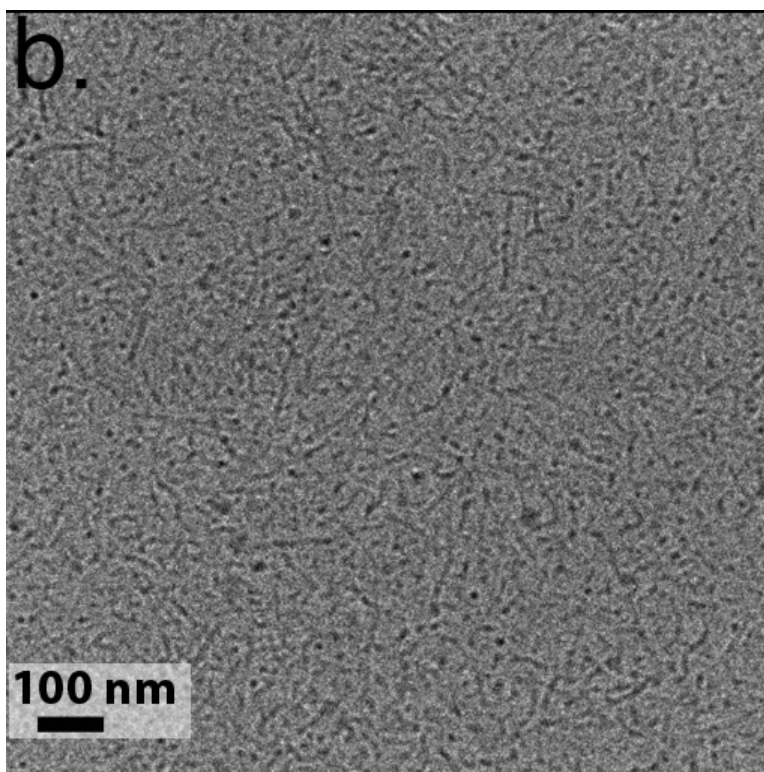

Figure 6b presented at a larger size.

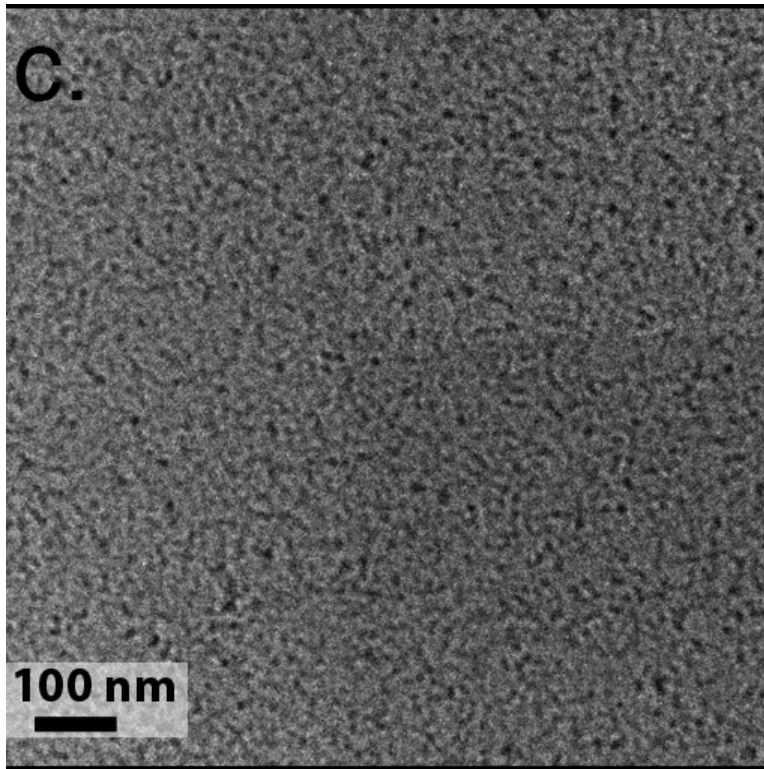

Figure 6c presented at a larger size.

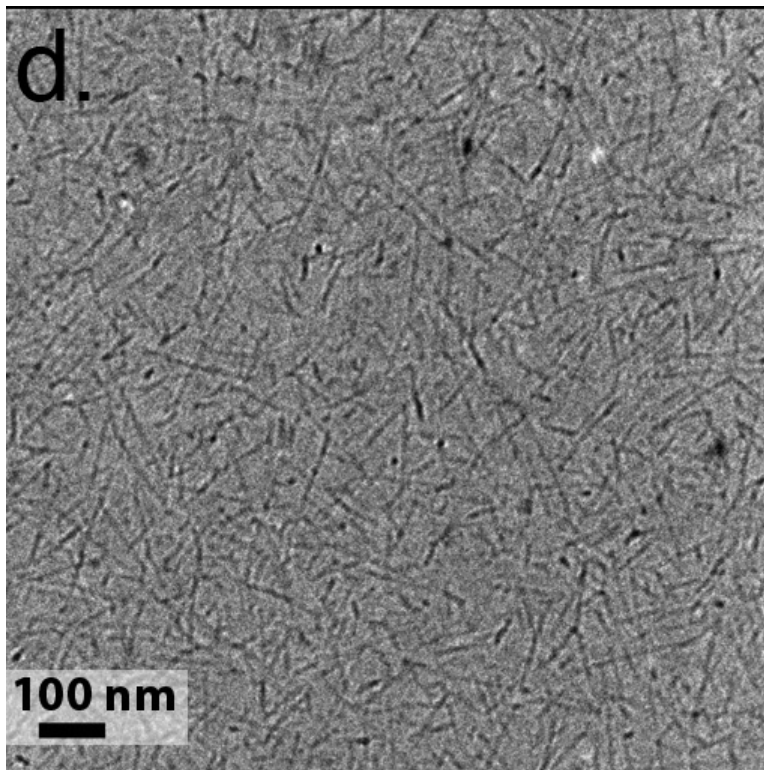

Figure 6d presented at a larger size.

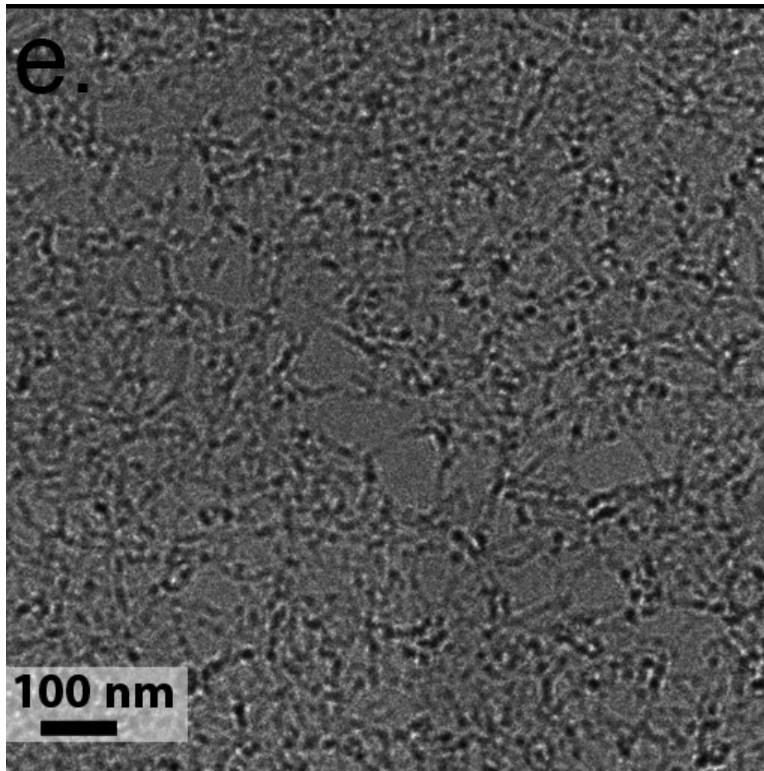

Figure 6e presented at a larger size.

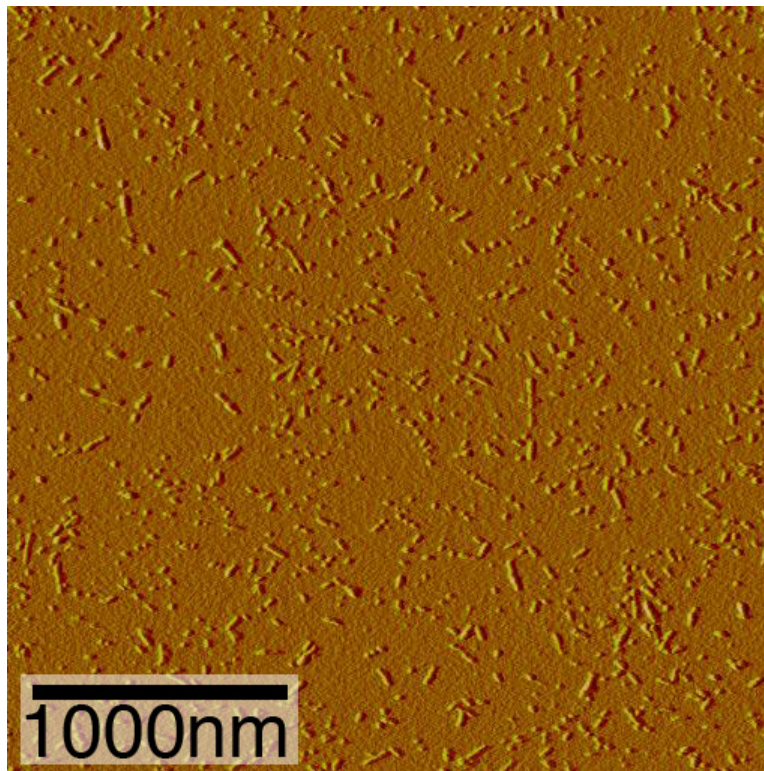

**Figure S2.** AFM of peptide  $K_2(QL)_6K_2$  under non-gelling conditions (no phosphate anion and low ionic strength).

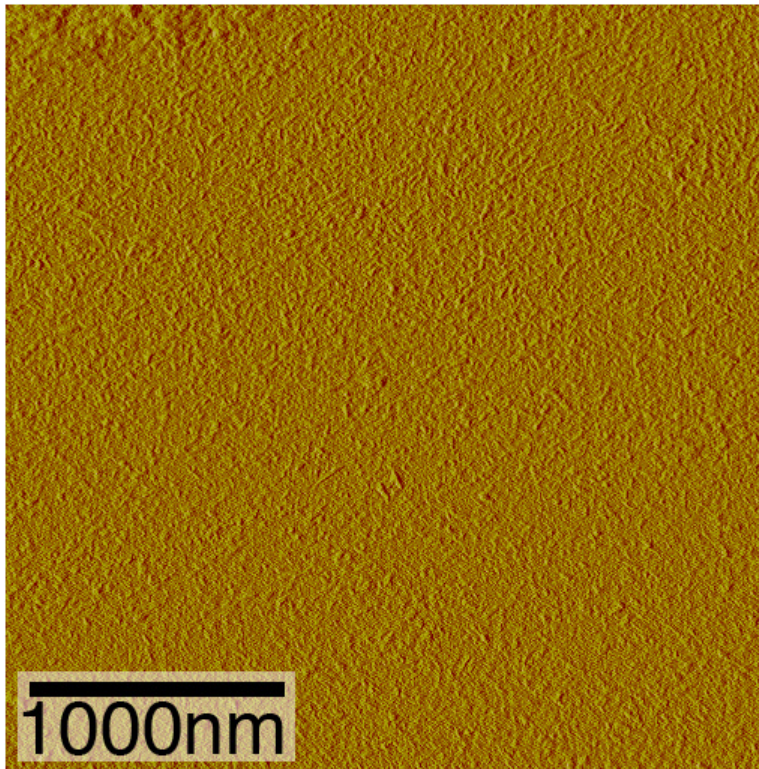

**Figure S3.** AFM of peptide K<sub>2</sub>(QFQL)<sub>3</sub>K<sub>2</sub> under non-gelling conditions (no phosphate anion and low ionic strength).

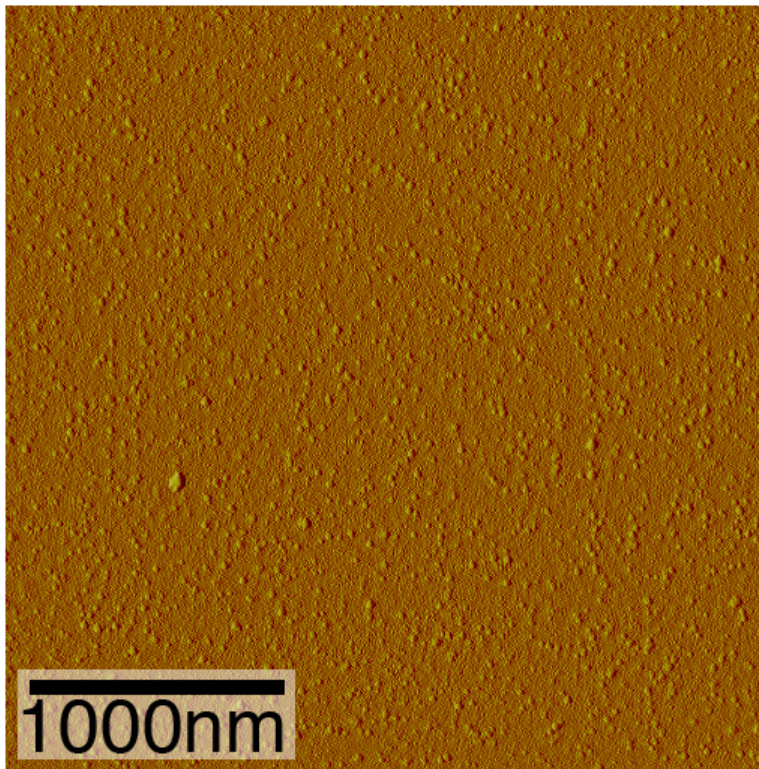

**Figure S4.** AFM of peptide K<sub>2</sub>(QF)<sub>6</sub>K<sub>2</sub> under non-gelling conditions (no phosphate anion and low ionic strength).

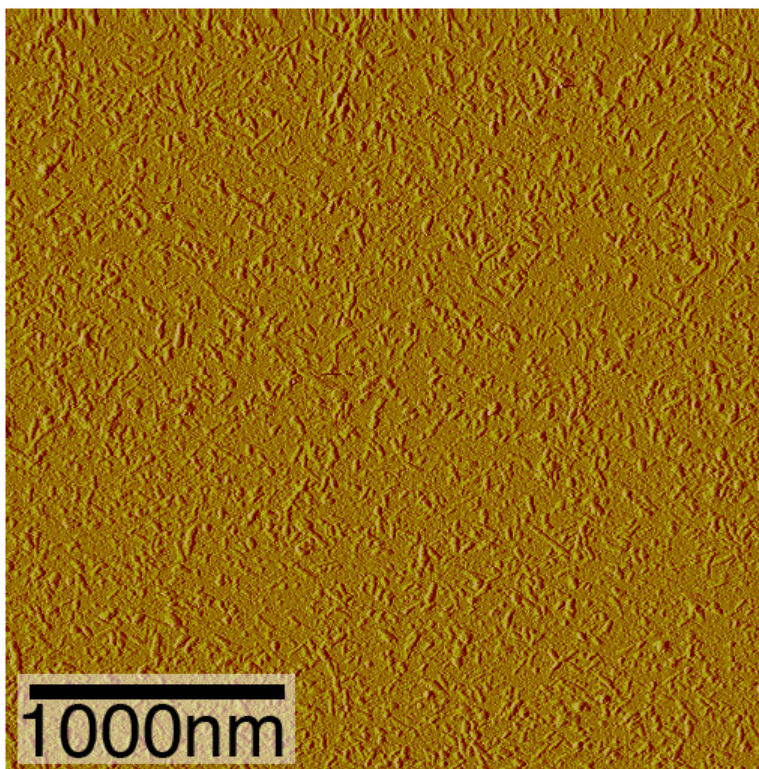

**Figure S5.** AFM of peptide K<sub>2</sub>(QW)<sub>6</sub>K<sub>2</sub> under non-gelling conditions (no phosphate anion and low ionic strength).

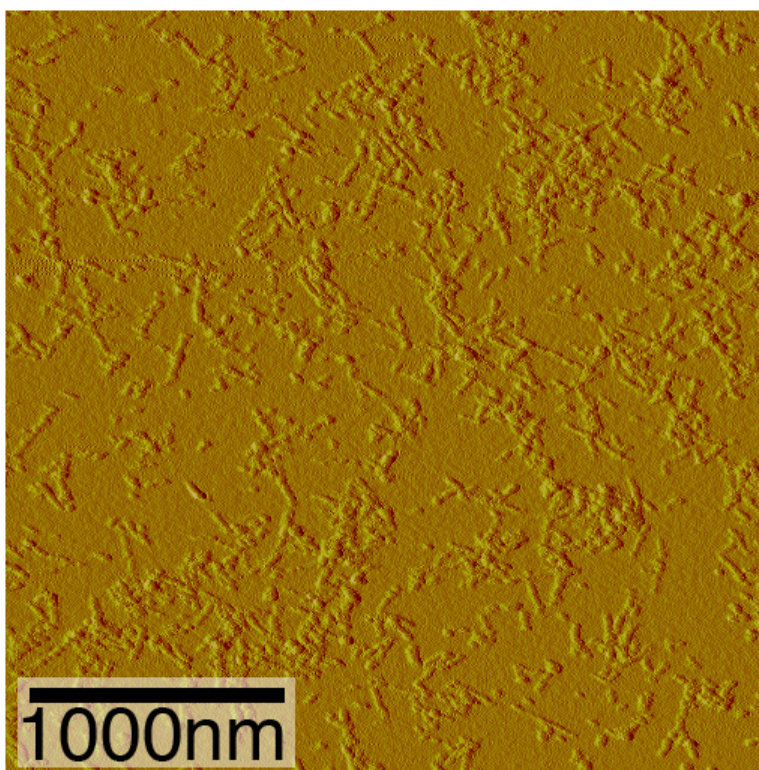

**Figure S6.** AFM of peptide K<sub>2</sub>(QY)<sub>6</sub>K<sub>2</sub> under non-gelling conditions (no phosphate anion and low ionic strength).

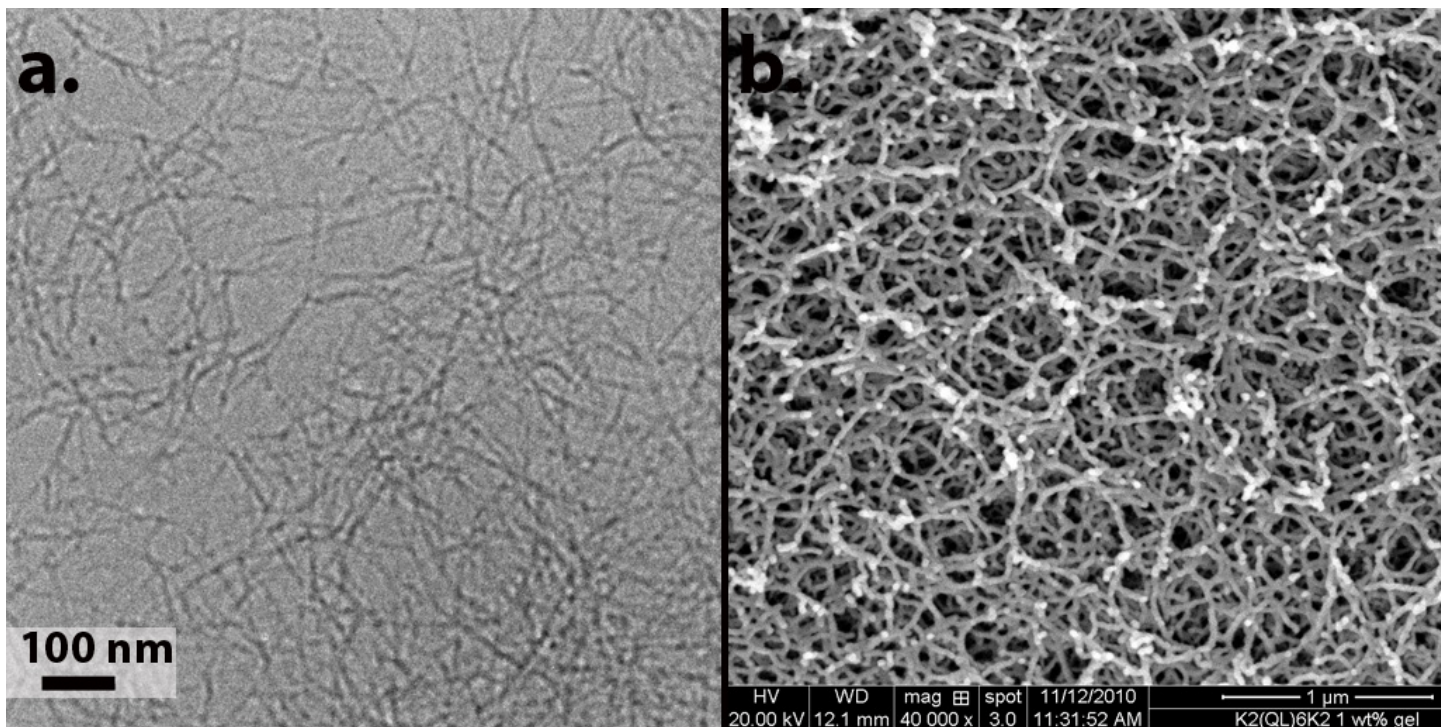

Figure 7a and 7b presented at a larger size.

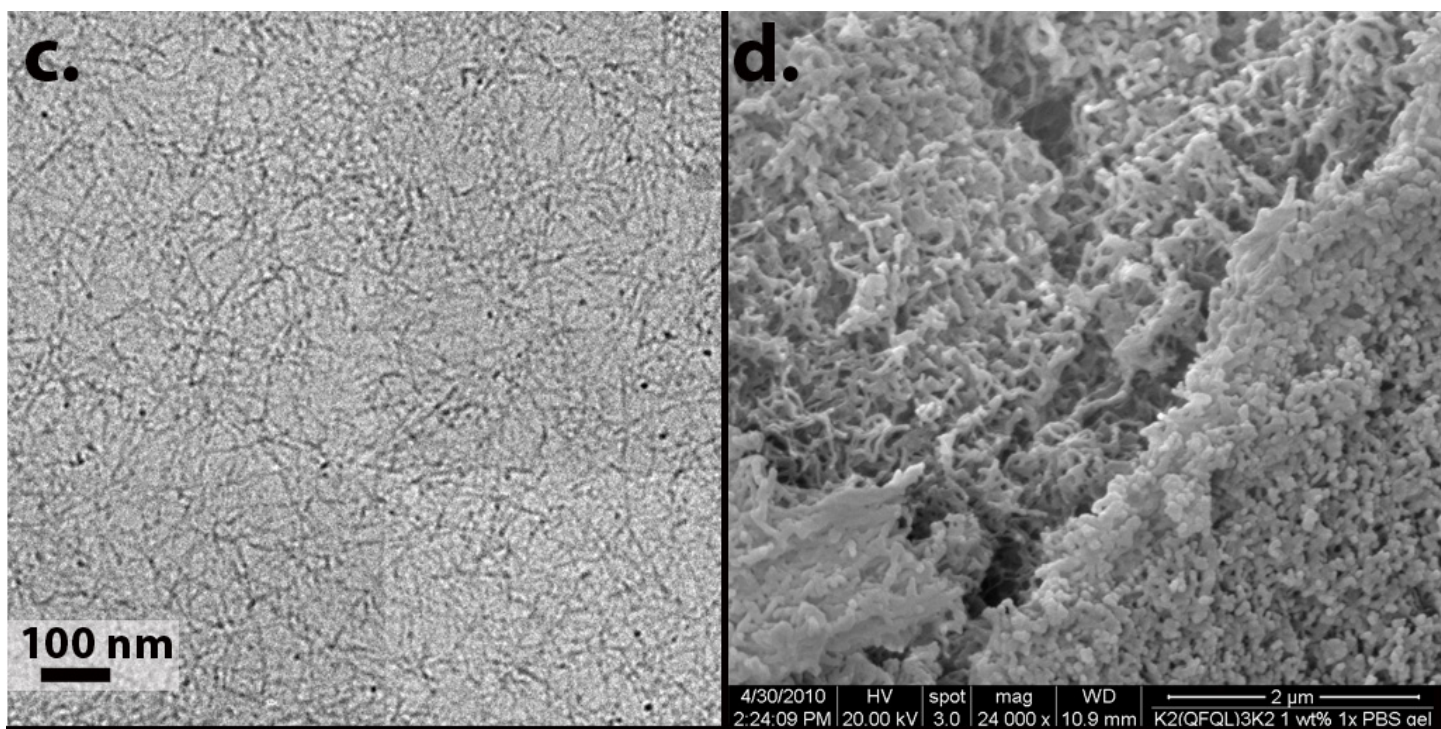

Figure 7c and 7d presented at a larger size.

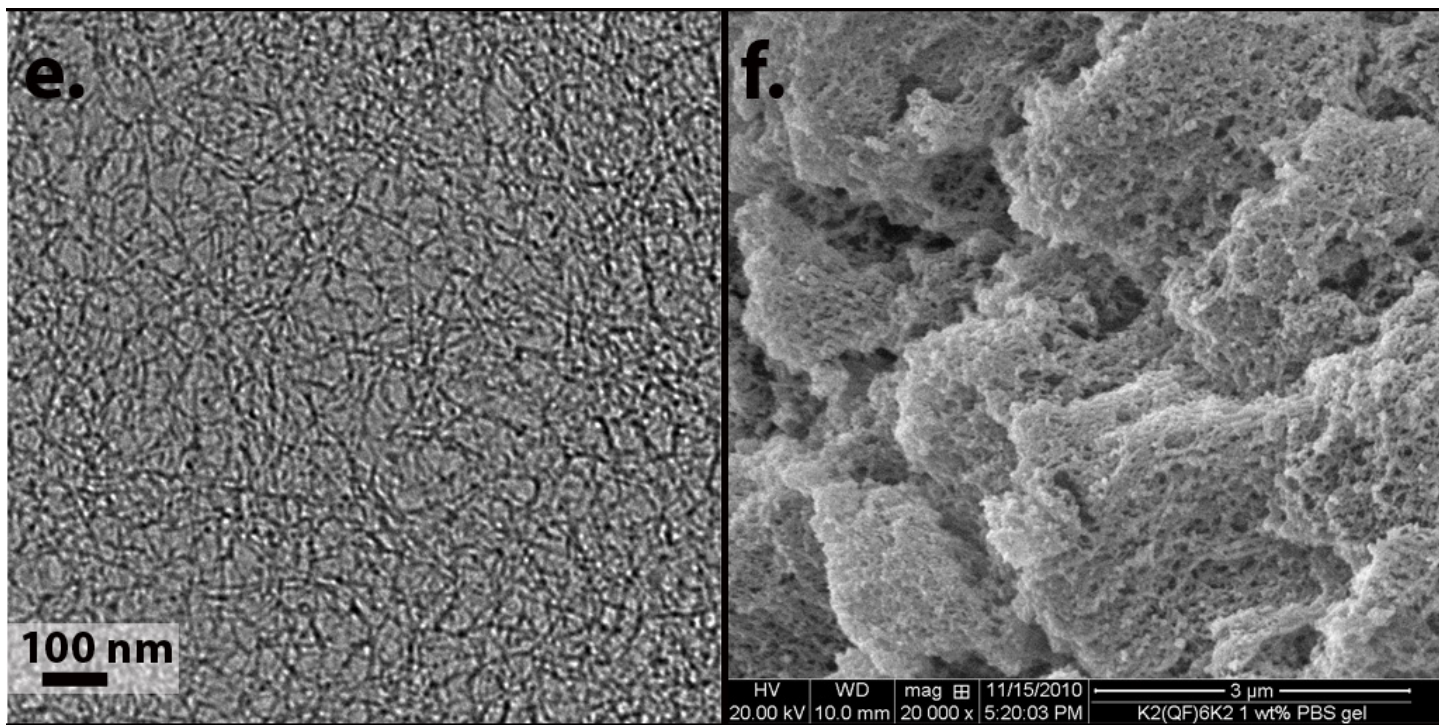

Figure 7e and 7f presented at a larger size.

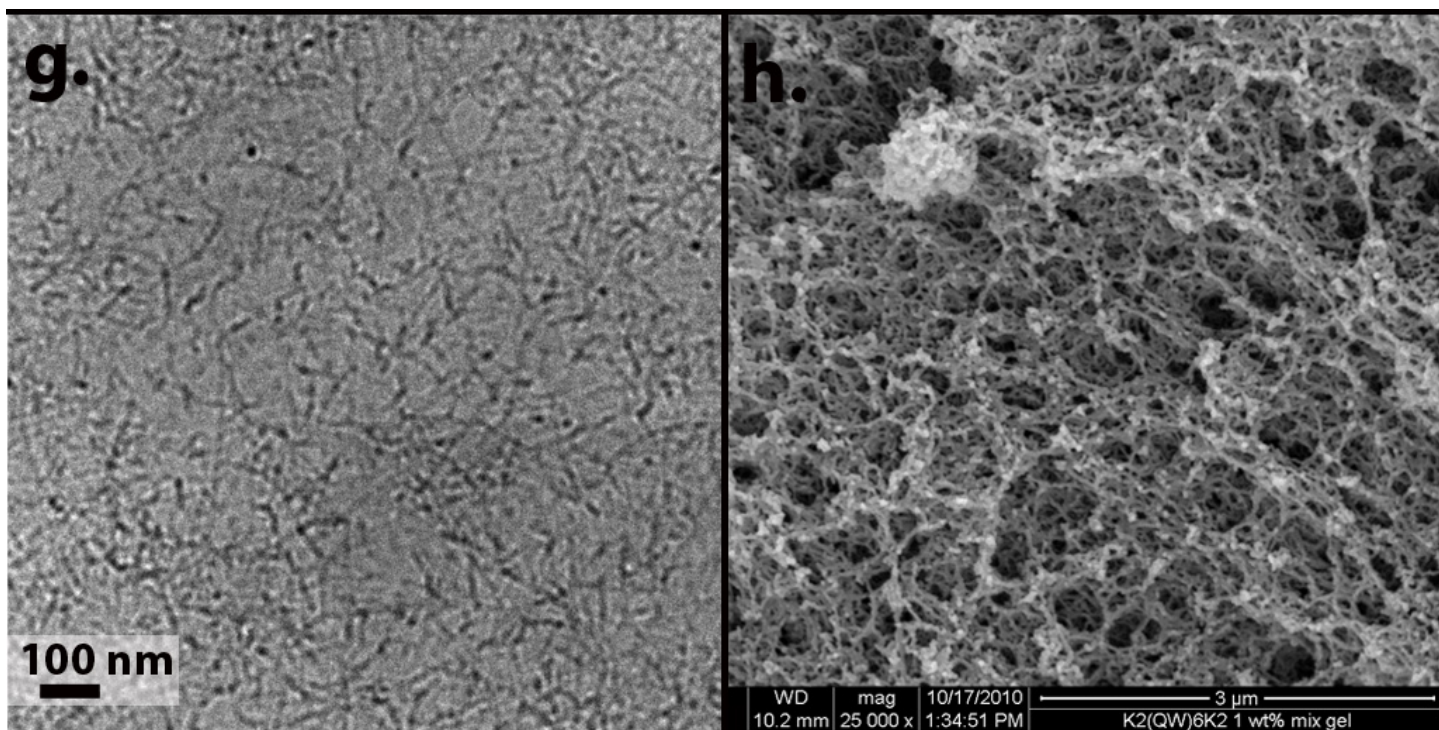

Figure 7g and 7h presented at a larger size.



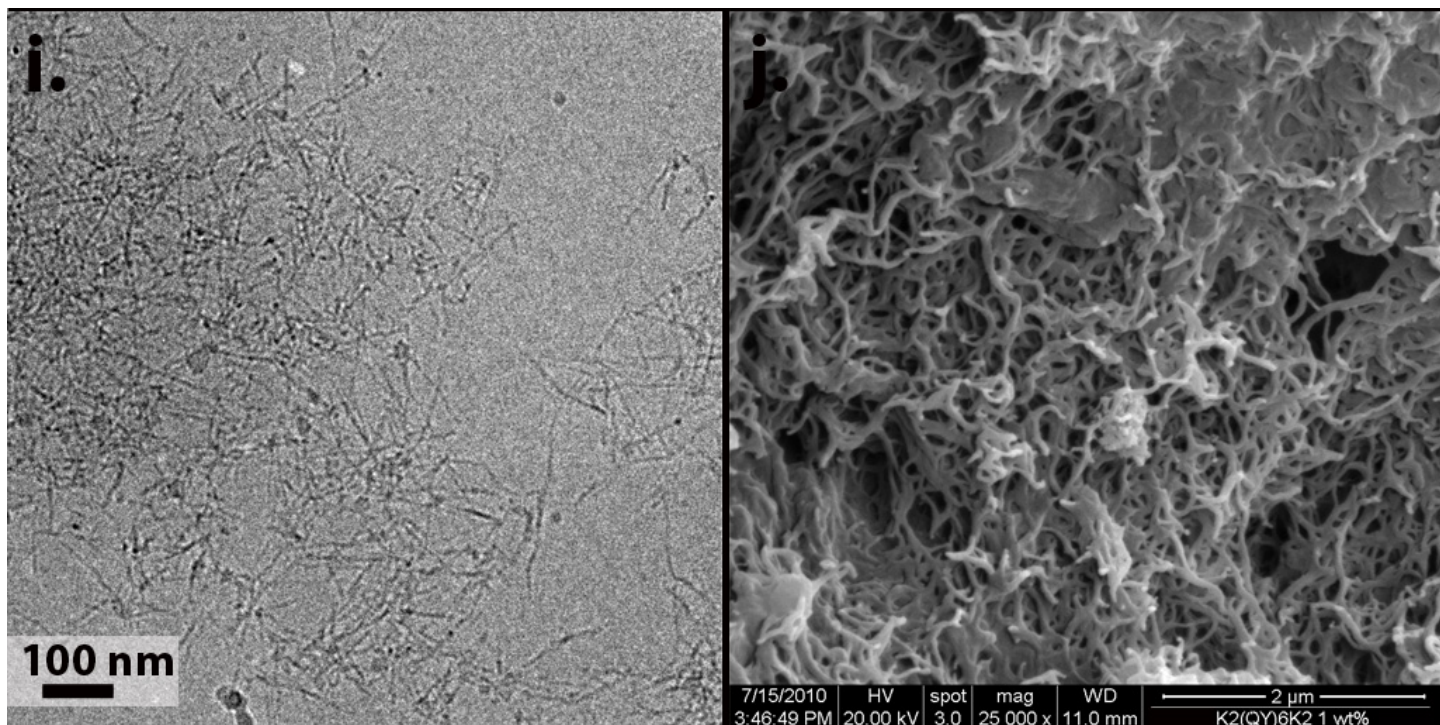

Figure 7i and 7j presented at a larger size.

Assignments from Grazing Angle FT-IR deconvolution.

| peak # | approximate position  | assignment                                                              |
|--------|-----------------------|-------------------------------------------------------------------------|
| 1      | 1695 $\text{cm}^{-1}$ | Amide I perpendicular; characteristic of anti-parallel $\beta$ -sheets  |
| 2      | 1675 $\text{cm}^{-1}$ | contribution from lysine side chain                                     |
| 3      | 1654 $\text{cm}^{-1}$ | contribution from glutamine side chain                                  |
| 4      | 1625 $\text{cm}^{-1}$ | Amide I parallel; characteristic of $\beta$ -sheet                      |
| 5      | 1612 $\text{cm}^{-1}$ | Amide I parallel; characteristic of extended fiber-like $\beta$ -sheets |
| 6      | 1547 $\text{cm}^{-1}$ | Amide II                                                                |
| 7      | 1520 $\text{cm}^{-1}$ | Amide II                                                                |

**Table S1**, peak assignments for deconvoluted grazing angle FT-IR spectra. Frequencies given are approximate and vary by several wave numbers depending on the individual peptide analyzed. Exact Values in table S2.

| IR Peak | QL   | QFQL | QF   | QW   | QY   |
|---------|------|------|------|------|------|
| 1       | 1695 | 1695 | 1698 | -    | 1696 |
| 2       | 1675 | 1669 | 1675 | 1687 | 1687 |
| 3       | 1654 | 1652 | 1661 | 1663 | 1657 |
| 4       | 1625 | 1625 | 1628 | 1632 | 1625 |
| 5       | 1612 | 1610 | 1618 | 1620 | 1608 |
| 6       | 1547 | 1548 | 1548 | 1554 | 1545 |
| 7       | 1521 | 1519 | 1517 | 1530 | 1516 |

**Table S2**. Exact values of deconvoluted peaks given in wave numbers,  $\text{cm}^{-1}$ .
